# Supplementary material
Source: Springer Nature journal article supplement (https://www.springermedizin.de/resource/supplementary/13075_2005_1765_MOESM9_ESM.pdf/9690524)

Figure 4b.

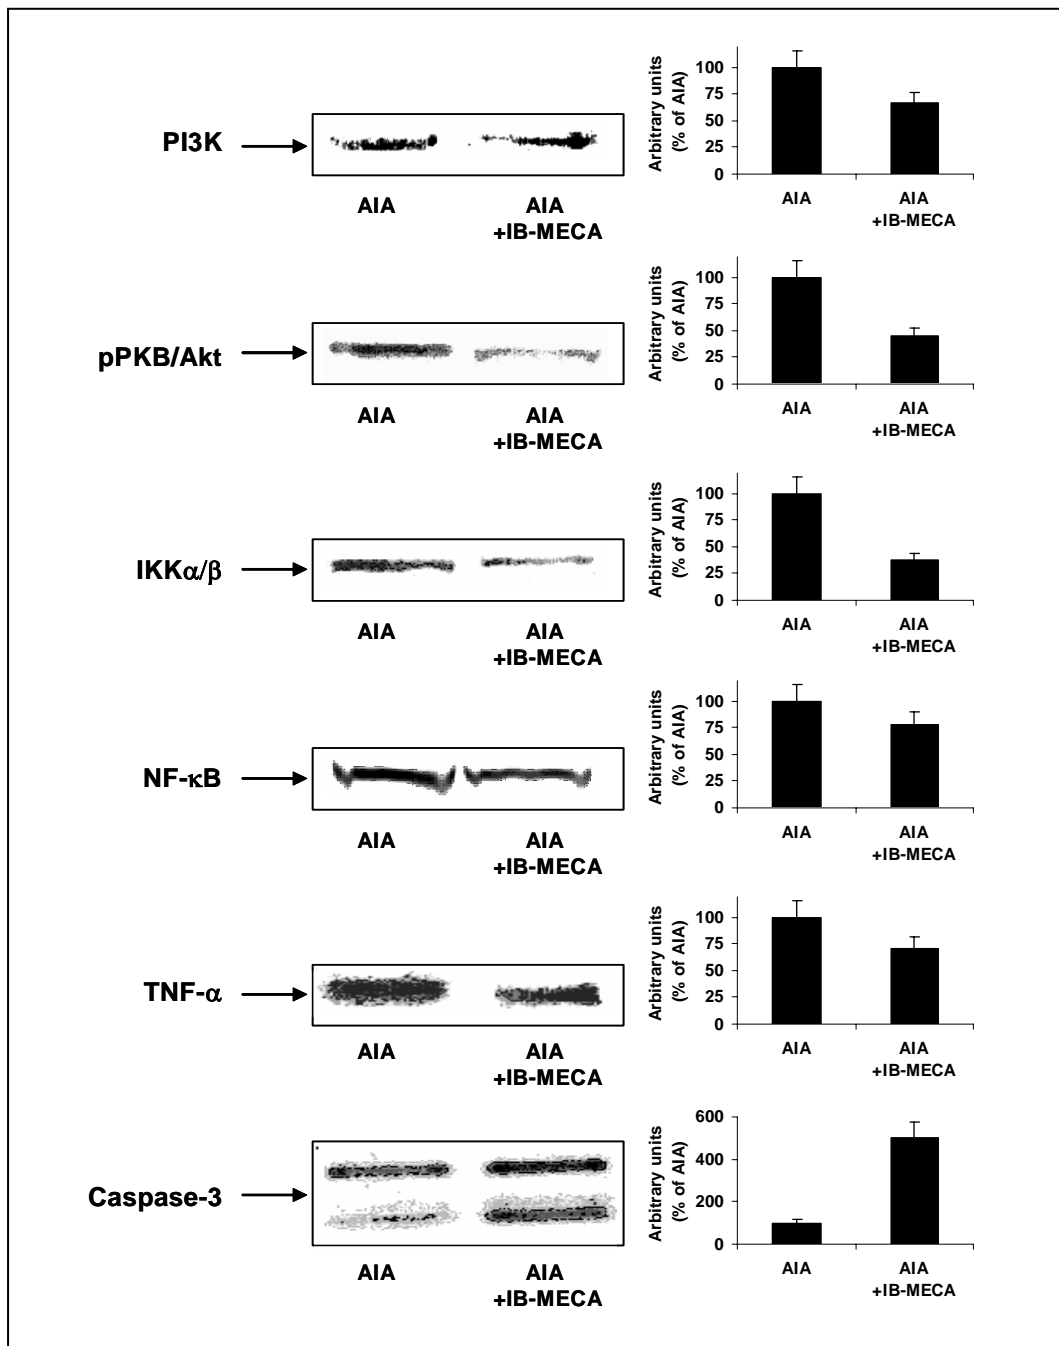

Supplement: MOESM9 [file 9690524]
